# Supplementary material
Source: Research Square preprint supplement (doi:10.21203/rs.3.rs-9163989/v1)
Supplement: Supplementary file 1 [file e730e19ae794236c629ebc14.docx]

# Manuscript title

**Short-Lived Success: Repeated Peroxide-Peracetic Acid-Based Foam Disinfection Selects for Carbapenem-Resistant Enterobacterales in Hospital Sinks Drains**

# Shireen M Kotay1, Aubrey E Hetzler1, Sharvari Narendra1, Kevin K Chau2,3, Salvador Castañeda-Barba1, Nicole Stoesser2,3,4, Amy J Mathers1,5#

# Supplemental materials

**Table S1.** Comparison of sink-drain CPE abundance at baseline and post-treatment endpoint (D35) across PPAA-foam treatment regimens

| **Treatment group** | **Baseline (D-3) mean ± SD (log₁₀ CFUml⁻¹)** | **Baseline median (IQR)** | **D35 mean ± SD (log₁₀ CFU ml⁻¹)** | **D35 median (IQR)** | **Adjusted p value† (Interpretation)** |
| --- | --- | --- | --- | --- | --- |
| **T3 (3-day interval)** | 7.55 ± 0.91 | 7.37 (0.44) | 7.39 ± 0.27 | 7.51 (0.54) | 1.00  (Not significant) |
| **T5 (5-day interval)** | 7.37 ± 1.09 | 7.33 (0.40) | 6.70 ± 2.02 | 7.57 (2.12) | 1.00  (Not significant) |
| **T7 (7-day interval)** | 7.23 ± 1.53 | 7.23 (0.59) | 7.08 ± 1.90 | 7.52 (0.44) | 1.00  (Not significant) |
| **Control (No treatment)** | 7.06 ± 0.21 | 7.42 (1.08) | 7.98 ± 0.56 | 8.03 (0.87) | 0.004 (Significant) |

† Wilcoxon signed-rank test comparing baseline (D–3) and D35 within each treatment group, with Bonferroni correction for multiple testing.

**Table S2. Carbapenemase-producing Enterobacterales strains used to inoculate experimental sinks.** List of isolates spiked into experimental sinks, including species, carbapenemase genotype, source, and date of isolation.

| **Isolate** | **Species** | **AMR gene harbored** | **Source** | **Isolation date** |
| --- | --- | --- | --- | --- |
| CAV1492 | *Serratia marcescens* | *bla*KPC-2 | Patient | Dec-2011 |
| CAV7026 | *Citrobacter freundii* | *bla*KPC-2 | Hospital Sink Drain | Oct-2017 |
| CAV7297 | *Enterobacter asburiae* | *bla*KPC-2 | Hospital Sink Drain | Dec-2017 |
| CAV7640 | *Enterobacter adelaidei* | *bla*NDM-1 | Hospital Sink Drain | Apr-2018 |
| CAV7887 | *Escherichia coli* | *bla*NDM-1 | Hospital Sink Drain | Nov-2018 |
| CAV7023 | *Klebsiella michiganensis* | *bla*KPC-2 | Hospital Sink Drain | Oct-2017 |
| CAV9733 | *Klebsiella pnuemoniae* | *bla*KPC-3 | Wastewater | May-2023 |
| CAV7420 | *Phytobacter diazotrophicus* | *blaKPC-3* | Hospital Sink Drain | Jan-2018 |
| CAV7307 | *Phytobacter ursingii* | *blaKPC-3* | Hospital Sink Drain | Dec-2017 |

#
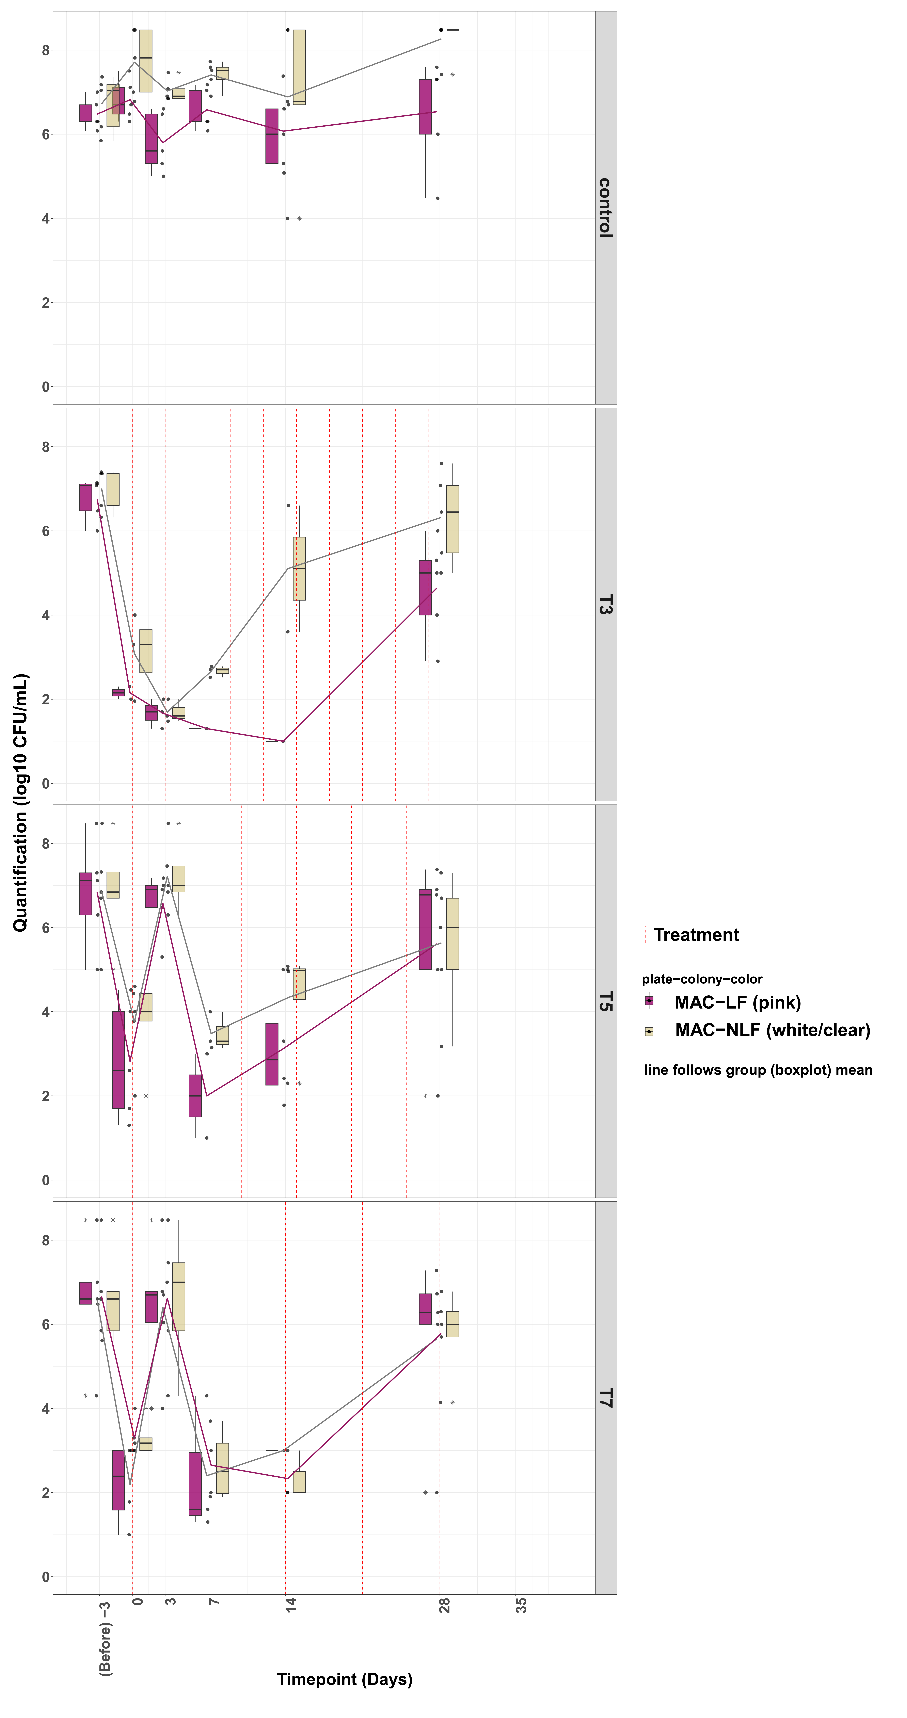


**Supplemental Figure S1**. **Quantitative culture of Gram-negative bacilli from experimental (SinkLab) sink-drains.** MacConkey agar cultures showing longitudinal counts of lactose-fermenting (LF) and non-lactose-fermenting (NLF) Gram-negative bacilli across treatment groups.


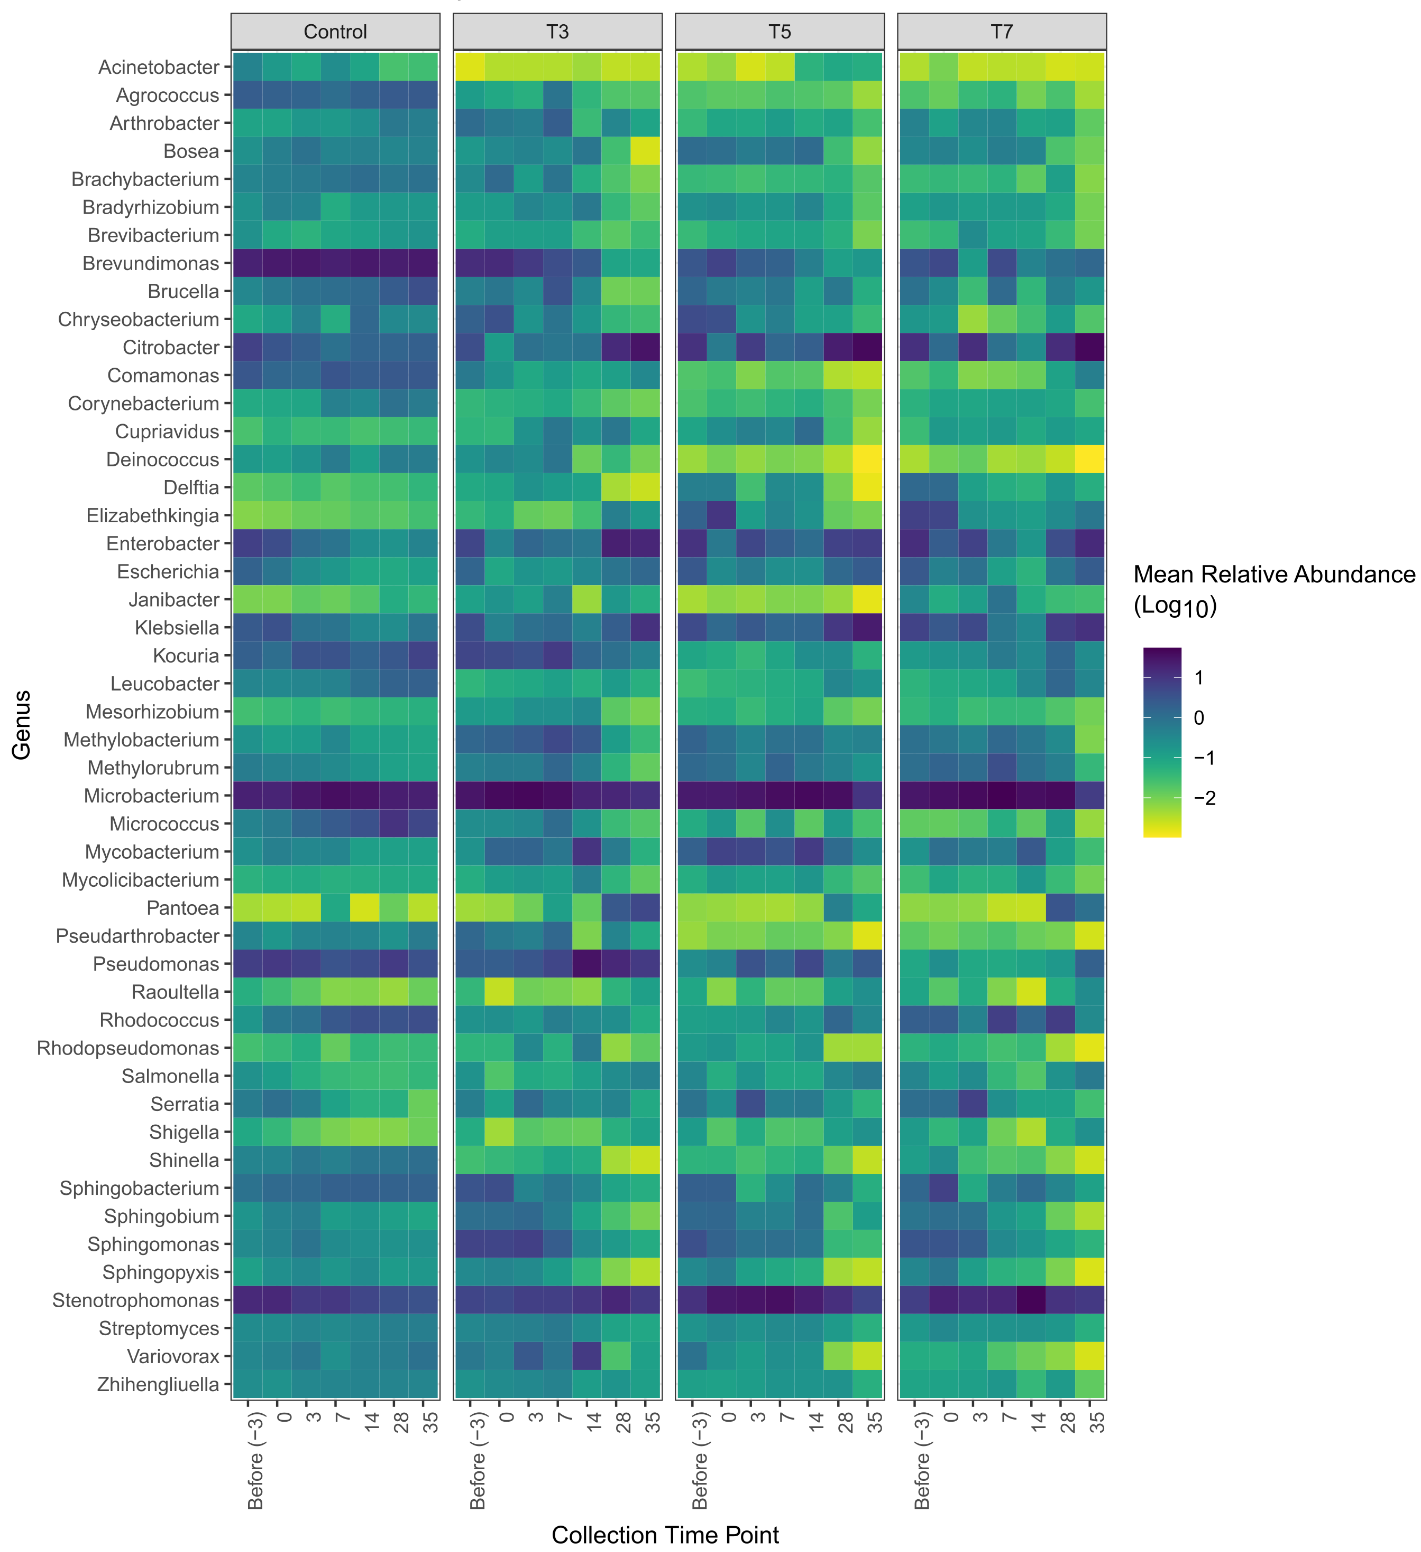


**Supplemental Figure S2**. **Temporal dynamics of the top 20 bacterial genera in experimental sink-drains.** Heatmap showing log transformed mean relative abundance across the sampling timepoints, stratified by treatment interval (Control, T3, T5 & T7).


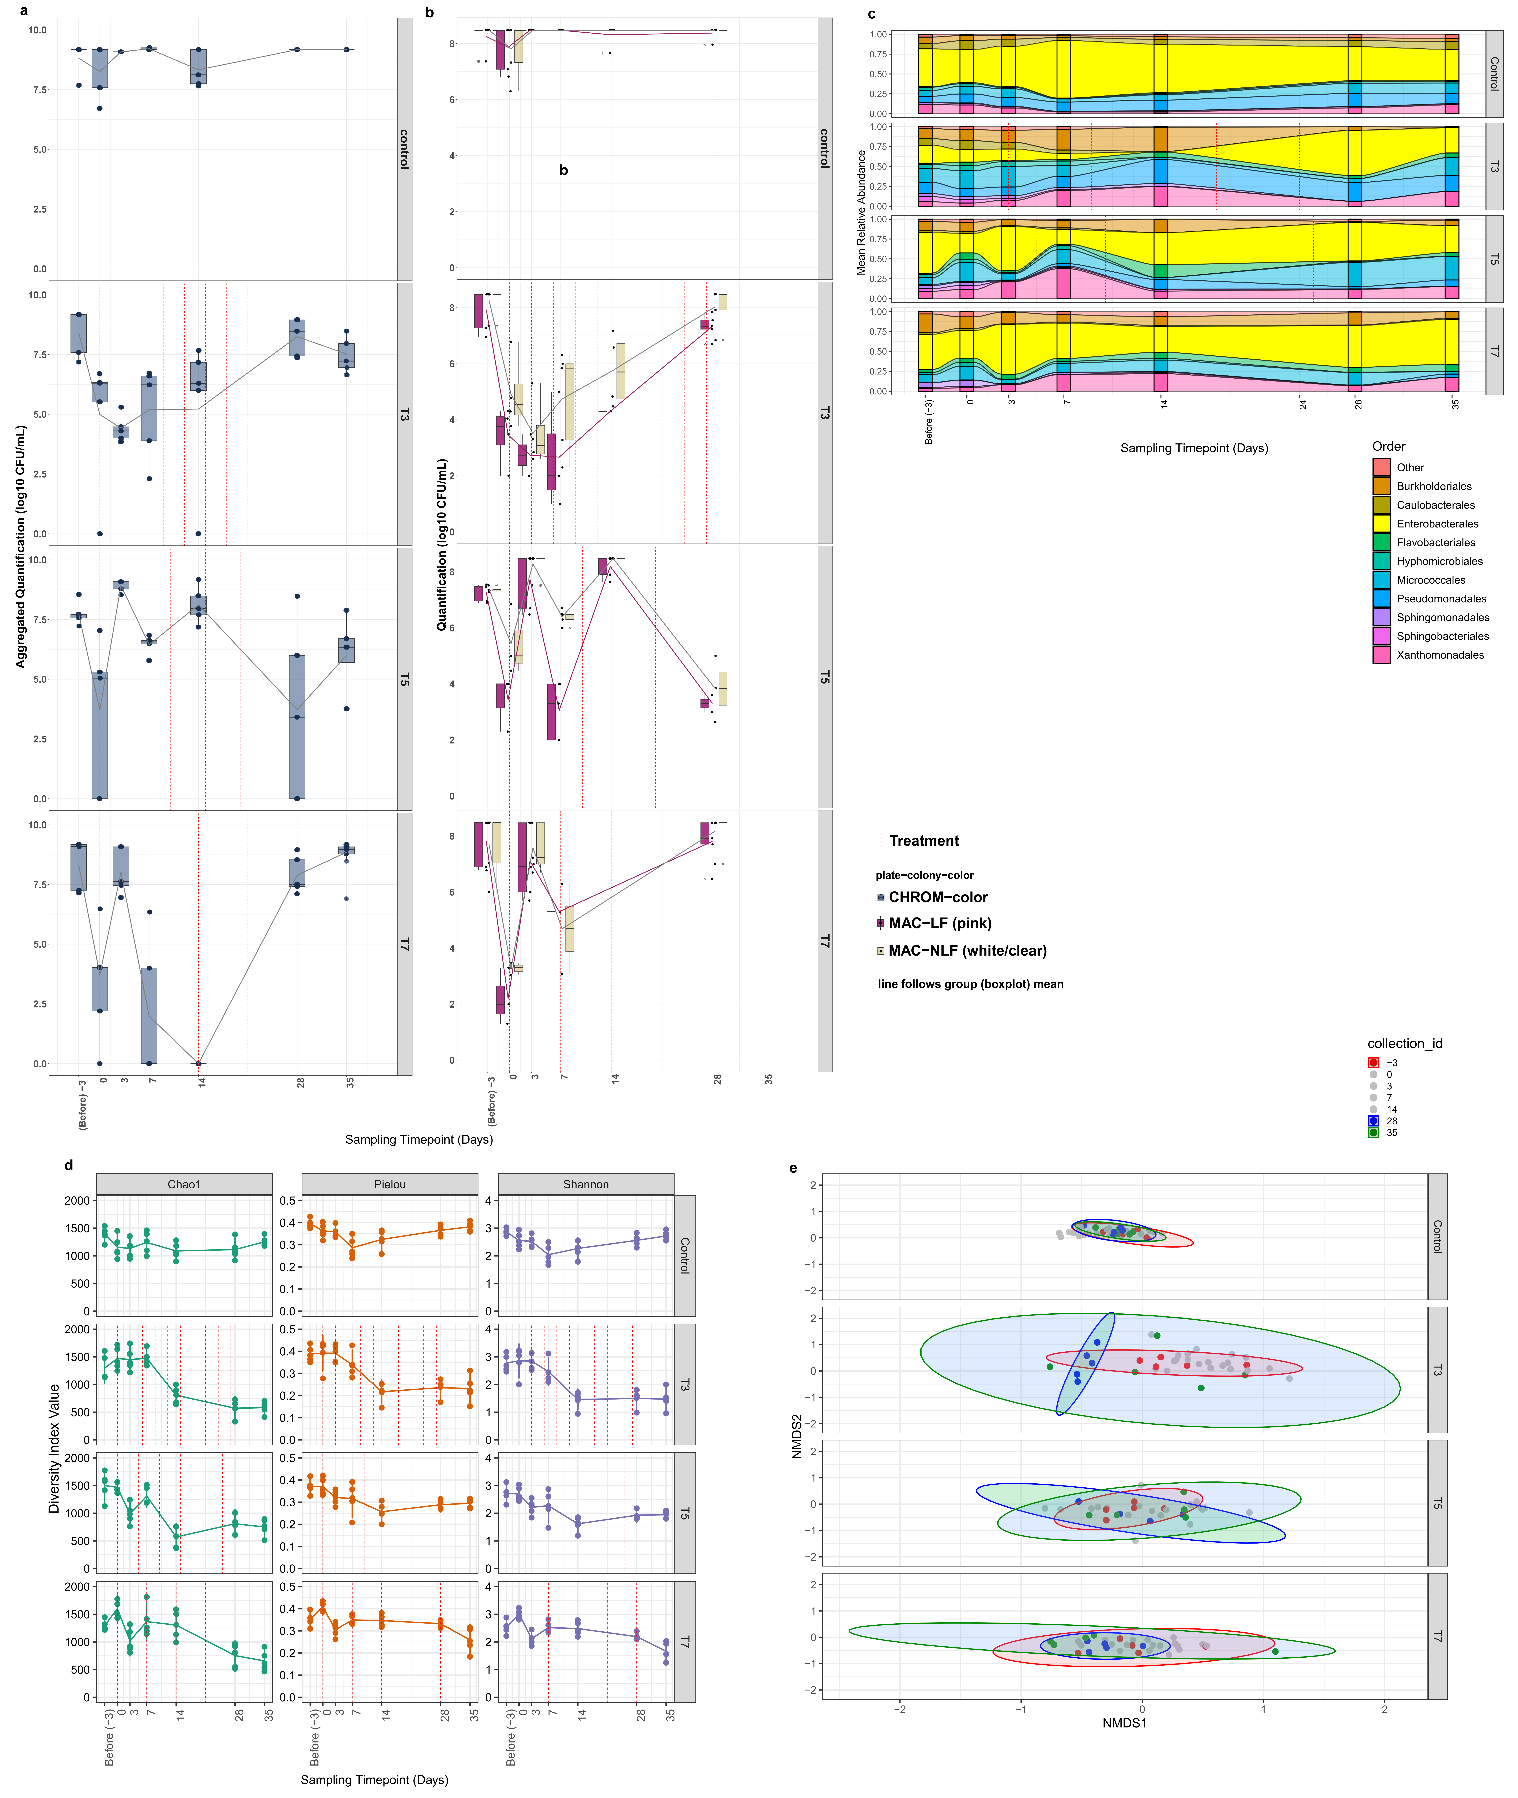


**Supplemental Figure S3.** **Effect of PPAA-foam treatment on bacterial populations in experimental (SinkLab) sink-traps.** Quantitative culture results for experimental (Sinklab) sink-traps for a) carbapenem-producing Enterobacterales (CPE) and b) Gram-negative bacilli. Cultures were performed on selective chromogenic agar and MacConkey agar respectively and for the latter, counts estimated for both lactose-fermenters (LF) and non-lactose-fermenters (NLF). c) Order-level relative abundance profiles of major bacterial orders in sink-traps over time and across treatment groups; d) Alpha-diversity indices for sink-trap microbiomes over time and across treatment groups and, E) Non-metric multidimensional scaling (NMDS) ordination based on Bray–Curtis dissimilarities at the genus-level comparing baseline (D-3) to post-treatment timepoints (D28, D35).


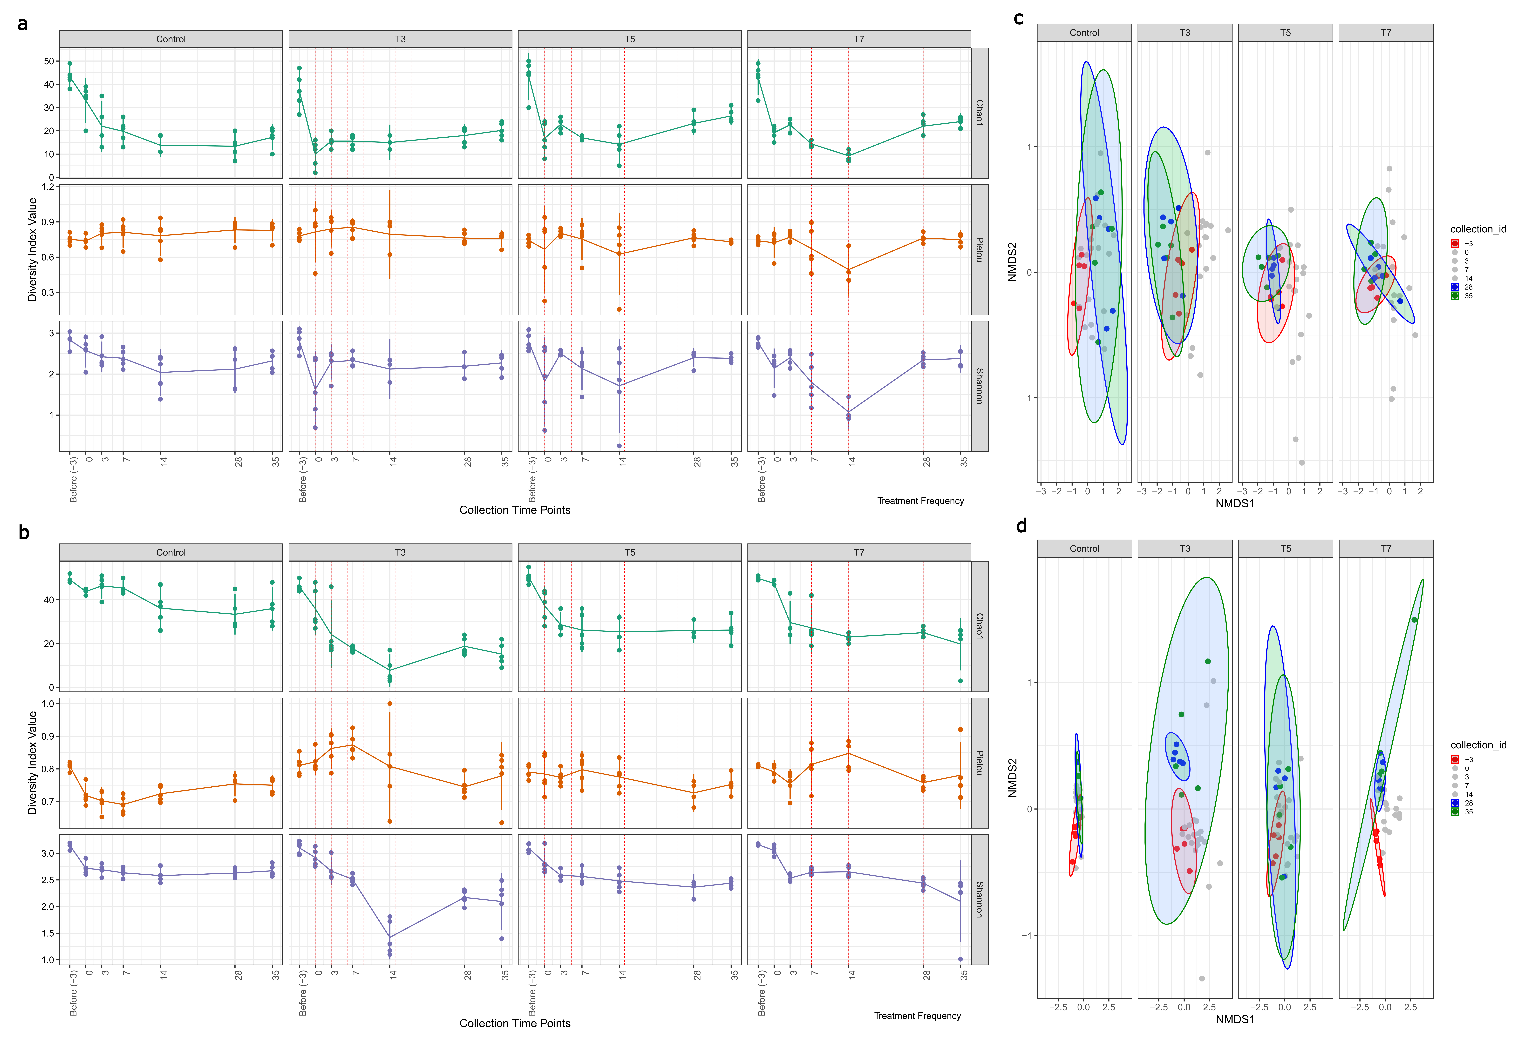


**Supplemental Figure S4. Resistome responses to PPAA-foam treatment in experimental (SinkLab) sink-drains and sink-traps.** Change in alpha-diversity indices of AMR gene families for a) sink-drain and b) sink-trap across the treatment groups. Non-metric multidimensional scaling (NMDS) plots showing Bray–Curtis dissimilarities at the AMR gene family-level for c) sink-drain and d) sink-trap resistomes, comparing baseline (D-3) with post-treatment (D28, D35).


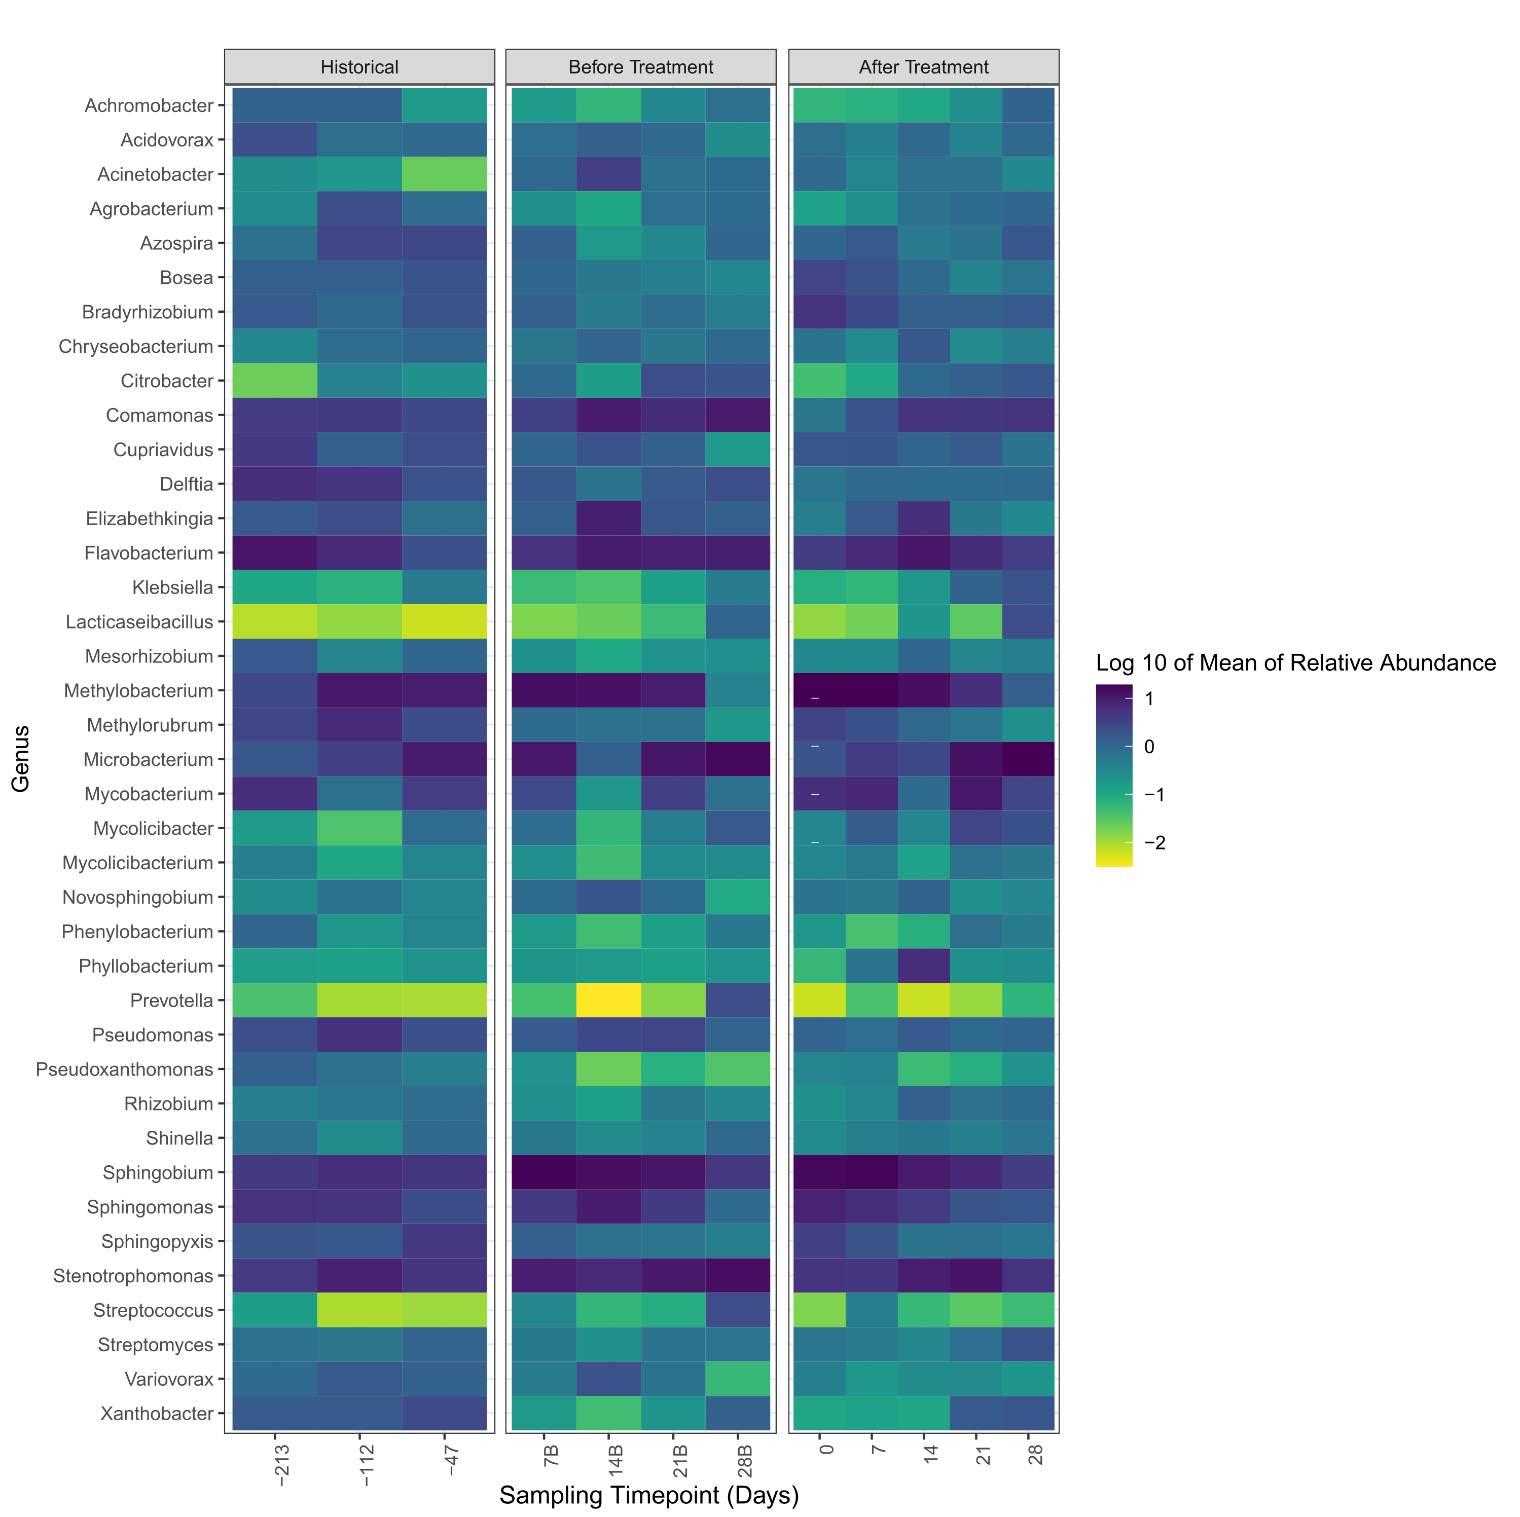


**Supplemental Figure S5**. **Temporal patterns in the top 20 bacterial genera in hospital sink drains.** Heatmap profile of the log transformed mean relative abundance across historical, immediately before-treatment and after-treatment the sampling timepoints.


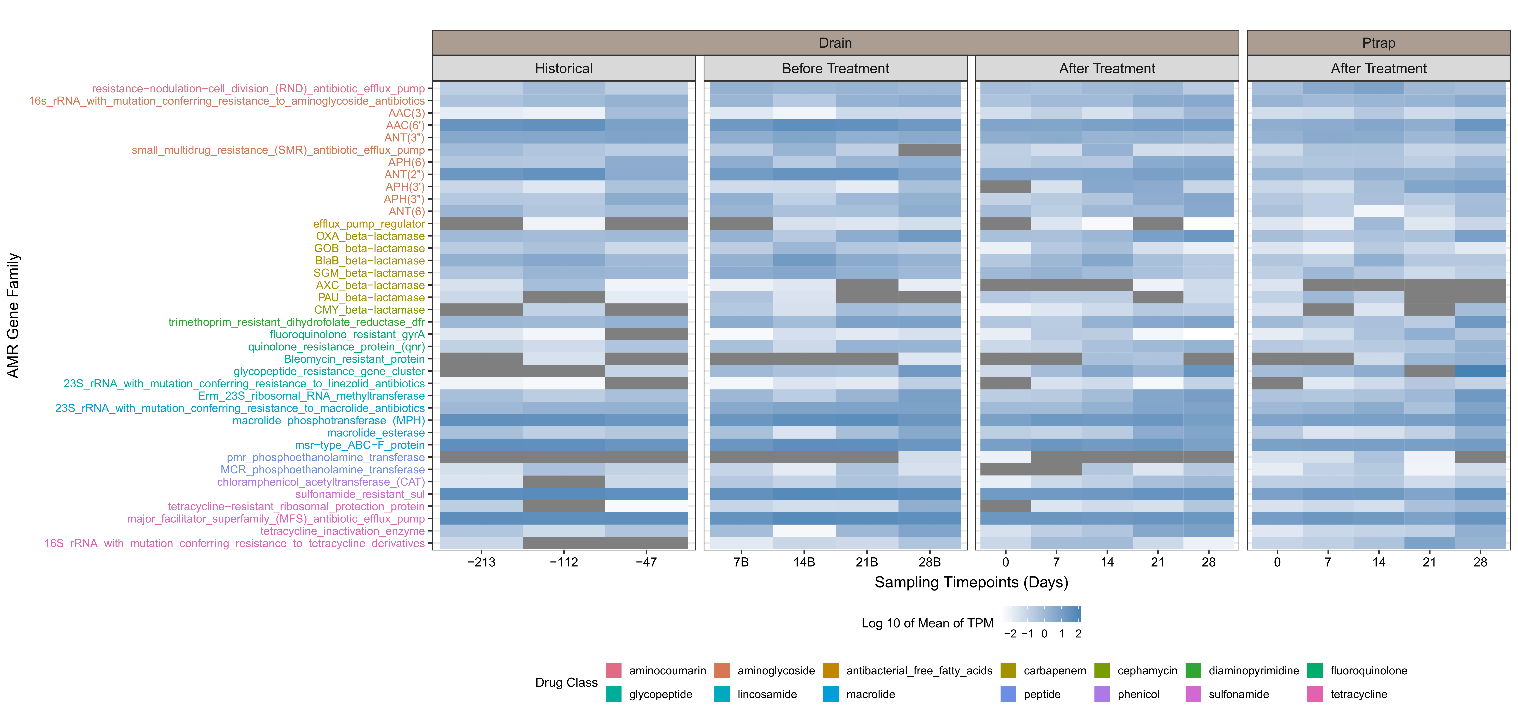


**Supplemental Figure S6. Shifts in dominant AMR gene families in hospital sink-drains and sink-traps.** Heatmap of the changes in mean abundance (TPM) of the top 20 AMR gene families across treatment groups for sink-drains and sink-traps.


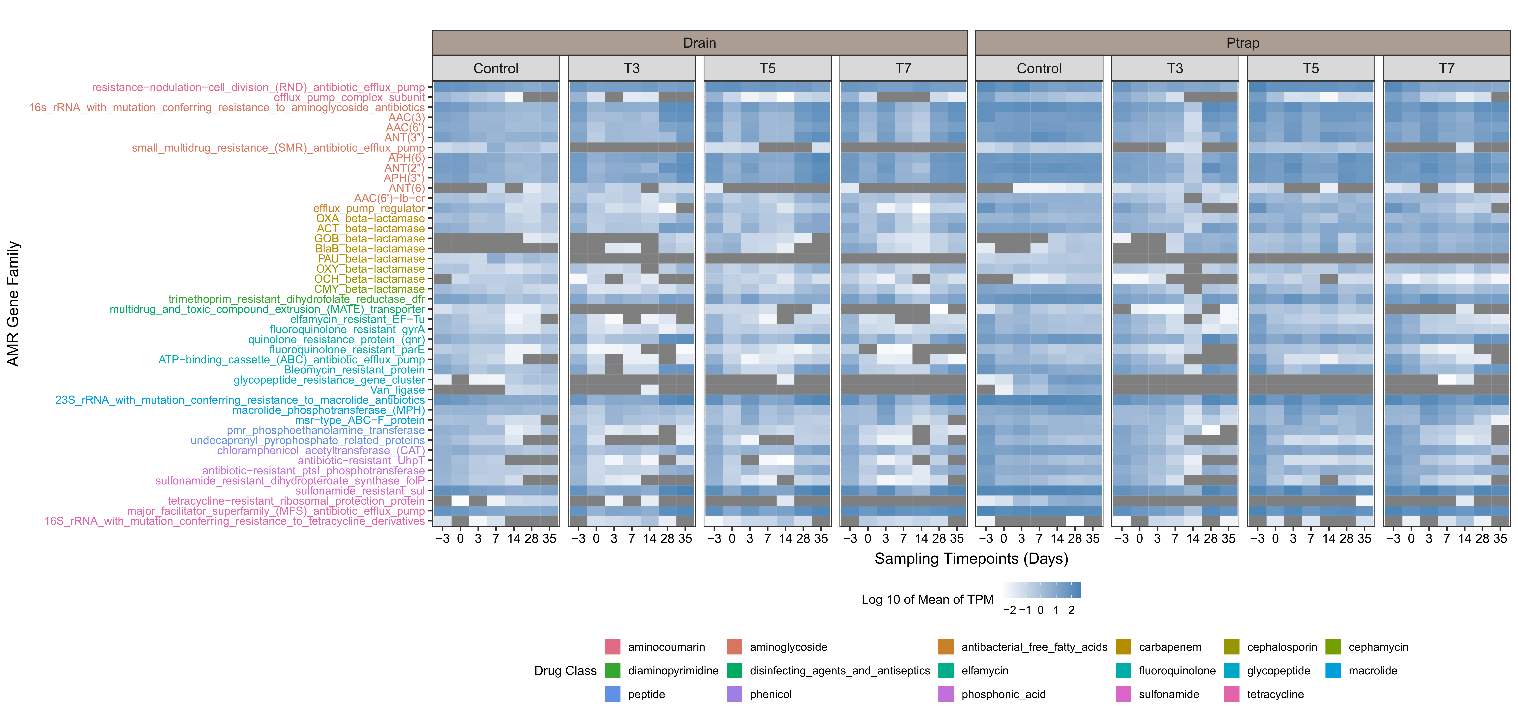


**Supplemental Figure 7. Shifts in dominant AMR gene families in experimental sink-drains and sink-traps.** Heatmap of the top 20 AMR gene families (TPM) across the treatment groups in the sink-drains and sink-traps.
